# Supplementary material for: A reconstructed graphite-like carbon micro/nano-structure with higher capacity and comparative voltage plateau of graphite
Source: Royal Society of Chemistry journal article supplement (doi:10.1039/c6ta02195f), 2016-01-01
Supplement: c6ta02195f1.pdf [file c6ta02195f1.pdf]

## **A reconstructed graphite-like carbon micro/nano-structure with higher capacity and comparative voltage plateau of graphite**

Zhen Ma,<sup>a</sup> Yan Cui,<sup>a</sup> Xin Xiao,<sup>a</sup> Yaoming Deng,<sup>ab</sup> Xiaona Song,<sup>ab</sup> Xiaoxi Zuo,<sup>a</sup>

Junmin Nan<sup>\*a</sup>

- a. School of Chemistry and Environment, South China Normal University;  
Guangzhou Key Laboratory of Materials for Energy Conversion and Storage,  
Guangzhou 510006, PR China
- b. Dongguan McNair New Power Co. Ltd. , Dongguan 523000, PR China

\*Corresponding author: Junmin Nan

School of Chemistry and Environment, South China Normal University

College town, Guangzhou 510006, China

E-mail: [jmnan@scnu.edu.cn](mailto:jmnan@scnu.edu.cn); Tel.: +86-20-39310255; Fax: +86-20-39310187

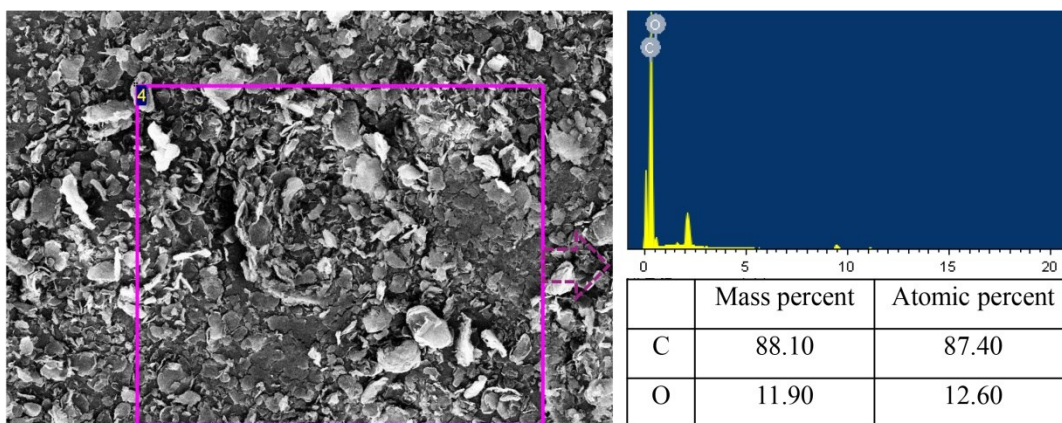

Figure S1. EDX spectra of r-GC and its element composition

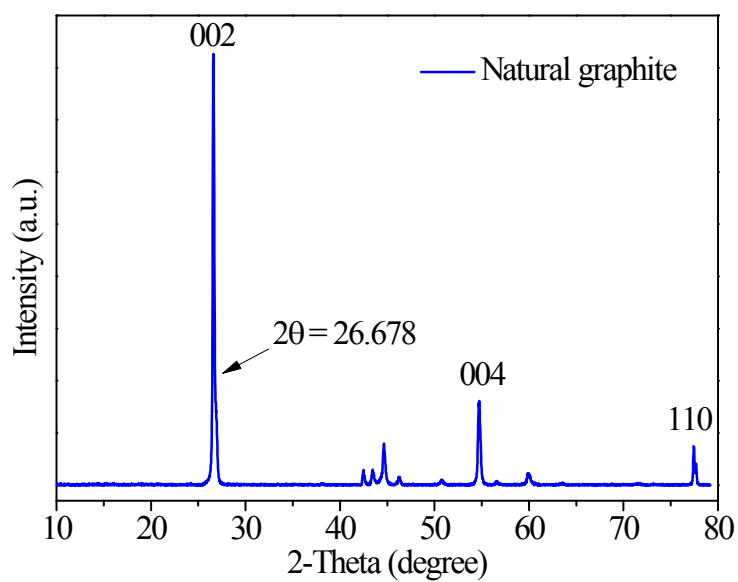

Figure S2. XRD pattern of natural graphite
